# Supplementary material for: Exploration of the Mechanism, Chemospecificity, Regiospecificity and Stereoselectivity of the Cycloaddition Reaction between Hydroxyparthenolide and Nitrilimine: MEDT Study
Source: Research Square preprint supplement (doi:10.21203/rs.3.rs-1338725/v1), 2022-02-15
Supplement: Supplementary file 1 [file 4b91fd21766cbd2b16022019.docx]

**Fig. S1** Electronic structure and reactivity of TACs in 32CA reactions
