# Supplementary material for: Exploration of the Mechanism, Chemospecificity, Regiospecificity and Stereoselectivity of the Cycloaddition Reaction between Hydroxyparthenolide and Nitrilimine: MEDT Study
Source: Research Square preprint supplement (doi:10.21203/rs.3.rs-1338725/v1), 2022-02-15
Supplement: Supplementary file 2 [file 690f9056c14df6b974575e49.docx]

**Exploration of the Mechanism, Chemospecificity, Regiospecificity and Stereoselectivity of the Cycloaddition Reaction between Hydroxyparthenolide and Nitrilimine: MEDT Study**

Zinab Ouahdi1, Najia Ourhriss2, Anas Ouald Aytouna1, Ali Barhoumi1, Mohammed Elalaoui Belghiti3, Amine Moubarik4, Habib El Alaoui El Abdallaoui1, Mohammed El idrissi4*, Abdellah Zeroual1*****

1 Molecular Modelling and Spectroscopy Research Team, Faculty of Science, ChouaïbDoukkali University, P.O. Box 20, 24000 El Jadida, Morocco.

2 Laboratory of Biomolecular Chemistry, Natural Substances and Reactivity, URAC 16, Faculty of Sciences Semlalia, Cadi Ayyad University, P.O. Box 2390, Marrakech, Morocco

3Laboratoire de Chimie Physique des Matériaux, Faculté des Sciences Ben M'Sick, Hassan II University of Casablanca, Casablanca, Morocco.

4 Laboratory of Chemical Processes and Applied Materials, Polydisciplinary Faculty, Sultan MoulaySlimane University, Beni-Mellal, Morocco.

*** Corresponding author:** [abdellahzeroual2@gmail.com](mailto:abdellahzeroual2@gmail.com); m.elidrissi2018@gmail.com

| **Table of Contents** | **Pages** |
| --- | --- |
| **Figure S1.** Electronic structure and reactivity of TACs in 32CA reactions | 2 |
| **Table S1.** B3LYP/6-31G(d) total (E, in a.u.) and relativea (ΔE, in kcal·mol-1) energies, in gas phase and in DCM, for the species involved in the 32CA reaction of hydroxyparthenolide**1** and nitrileimine**2**. | 3 |
| **Table S2.** B3LYP/6-31G(d) enthalpies (H, in a.u.), entropies (S, in cal·mol-1·K-1) and Gibbs free energies (G, in a.u.), and relativea enthalpies (ΔH, in kcal·mol-1), entropies (ΔS, in cal·mol-1·K-1) and Gibbs free energies (ΔG, in kcal·mol-1), computed at 25 ºC and 1 atm in DCM, for the stationary points involved in the 32CA reaction of hydroxyparthenolide**1** and nitrileimine**2**. | 4 |
| **Table S3.** ELF valence basin populations, distances of the C2[C1]–C3[N1] forming bonds, IRC values, and relativea electronic energies of **TS4** and the selected structures of the IRC involved in the formation of the new C2[C1]–C3[N1]single bonds along the 32CA reaction of hydroxyparthenolide**1** and nitrileimine**2**. | 5 |
| **Figure S2**. Numbering used in ELF study | 8 |
| B3LYP/6-31G(d) Cartesian coordinates and electronic energies for all optimized structures, together with the single imaginary frequencies for TSs | 9 |

**B3LYP/6-31G(d) Cartesian coordinates and electronic energies for TSs structures, together with the single imaginary frequencies.**

**TS-1 GAS**

E(RB3LYP) = -1630.63298304A.U.

1 imaginary frequency -327.0418 cm-1

Sum of electronic and zero-point Energies= -1630.122574

Sum of electronic and thermal Energies= -1630.089902

Sum of electronic and thermal Enthalpies= -1630.088958

Sum of electronic and thermal Free Energies= -1630.188629

E (Thermal) CV S

KCal/Mol Cal/Mol-Kelvin Cal/Mol-Kelvin

Total 340.788 124.329 209.776

C 1.84807253 -0.83900225 0.00000000

C 0.54961553 -0.65389925 0.78494900

C -0.02222947 -1.84754725 1.44250100

C -0.37225447 -2.99334625 -1.75041300

C 0.86333153 -2.69561625 -1.31815200

C 1.63650853 -1.41220525 -1.43271100

C -1.48521047 -2.18193025 1.69908500

C -2.39029947 -2.42871625 0.45455300

C -2.34306947 -3.77484925 -0.28861100

C -1.07649947 -4.16695725 -1.09253500

C -1.13606747 -2.23139625 -2.80531200

C -0.28773247 0.54400575 0.39227400

O -2.15062047 -1.11970425 2.42209500

C -3.50632947 -1.19346025 2.20757100

C -3.74939147 -2.13275225 1.09063200

O -4.28558347 -0.55116625 2.87766900

O -1.54570747 -5.14257425 -2.03327800

O 0.65960453 -0.85886125 2.21713400

C -4.85566247 -0.26733025 -0.23926000

N -5.78388347 -0.96910425 -0.54745300

N -6.14250847 -2.20471225 -0.43308800

C -4.87156747 -2.93616525 1.07081800

C -4.15066147 0.95679375 -0.47203400

C -3.88713747 1.82938575 0.60395300

C -3.22478847 3.03093175 0.37874200

C -2.82144947 3.34338175 -0.91667900

C -3.05855247 2.49698775 -1.99826500

C -3.72494247 1.29873575 -1.77311700

C -7.49458447 -2.49547925 -0.23842500

O -7.85745547 -3.59192625 0.13571400

O -8.31834047 -1.46364525 -0.53002300

C -10.48354947 -0.47930725 -0.73417900

C -9.72853947 -1.74203425 -0.36445500

H 2.38036553 0.11903975 -0.06406200

H 2.49234553 -1.52110425 0.56800300

H 0.55425153 -2.76845925 1.34107700

H 1.32160253 -3.40781825 -0.62903200

H 1.11566053 -0.68187125 -2.06113600

H 2.62540053 -1.57344925 -1.88380400

H -1.51394547 -3.07144925 2.34642000

H -2.14965747 -1.63081125 -0.25782500

H -3.16591647 -3.76429925 -1.01395800

H -2.56425747 -4.59657025 0.40343100

H -0.35948247 -4.63954525 -0.40300600

H -0.51496247 -1.48473525 -3.30691200

H -1.50503947 -2.93399925 -3.56181100

H -2.02143547 -1.72174625 -2.40302500

H 0.31130153 1.45740775 0.49499300

H -0.61628547 0.47839275 -0.65151000

H -1.16282547 0.63414275 1.03486800

H -0.76641547 -5.49247625 -2.49378300

H -4.87229047 -3.90320425 0.58535000

H -5.62154647 -2.79470225 1.84273300

H -4.20124947 1.54866775 1.60358100

H -3.01549747 3.72248875 1.18763800

H -2.72847747 2.78836875 -2.98965900

H -3.93358347 0.62689775 -2.59952600

H -11.56045447 -0.64556425 -0.62147600

H -10.19332047 0.35369775 -0.08599600

H -10.28513147 -0.19432125 -1.77237000

H -9.99887747 -2.58655225 -1.00626400

H -9.90993147 -2.04152225 0.67253100

F -2.18099447 4.50340575 -1.13572200

**TS-1 DCM**

E(RB3LYP) = -1630.65377774 A.U.

1 imaginary frequency -333.4895 cm-1

Sum of electronic and zero-point Energies= -1630.143729

Sum of electronic and thermal Energies= -1630.111038

Sum of electronic and thermal Enthalpies= -1630.110094

Sum of electronic and thermal Free Energies= -1630.209368

E (Thermal) CV S

KCal/Mol Cal/Mol-Kelvin Cal/Mol-Kelvin

Total 340.574 124.505 208.939

C 0.17006802 1.42857134 0.00000000

C -1.14380498 1.59782834 0.76085000

C -1.71899798 0.39271634 1.39091300

C -2.02812998 -0.69392966 -1.82508100

C -0.80065698 -0.40427866 -1.36310300

C -0.02073798 0.87792634 -1.44463600

C -3.18299398 0.04193634 1.61646100

C -4.07634898 -0.16844466 0.35840600

C -4.02130698 -1.50017766 -0.41068900

C -2.74089798 -1.87915566 -1.19897200

C -2.77210198 0.08398434 -2.88176900

C -1.97932898 2.79400634 0.36219400

O -3.86407798 1.08179334 2.37040600

C -5.21354398 1.00570034 2.13781300

C -5.44286498 0.11151334 0.98899500

O -6.00121098 1.61394434 2.83770900

O -3.19339498 -2.84342866 -2.16450600

O -1.06303298 1.37958034 2.20041000

C -6.53103698 1.99876134 -0.33133300

N -7.47224498 1.31152634 -0.62973300

N -7.83803598 0.07222734 -0.51478900

C -6.56496998 -0.69484966 0.94112600

C -5.79929398 3.20628834 -0.55322300

C -5.57335698 4.09681834 0.51690300

C -4.89250698 5.28825434 0.29798200

C -4.43229398 5.56830934 -0.98644700

C -4.62867798 4.70345434 -2.06145200

C -5.31515798 3.51571134 -1.84274700

C -9.19104198 -0.20388666 -0.33419600

O -9.56698998 -1.31496766 -0.00212700

O -10.00350498 0.84197934 -0.58416000

C -12.15515898 1.86794134 -0.76804900

C -11.42413798 0.58046234 -0.44132200

H 0.69977602 2.38881734 -0.04162700

H 0.80550602 0.73594034 0.56509800

H -1.13148398 -0.52011666 1.29451300

H -0.35501798 -1.13006166 -0.68038900

H -0.52400498 1.62165234 -2.07097200

H 0.97597102 0.71759234 -1.87748400

H -3.21667698 -0.86388866 2.23773800

H -3.83040798 0.64352534 -0.33526200

H -4.83199498 -1.46737466 -1.14923700

H -4.25610698 -2.33278666 0.26336300

H -2.03755898 -2.36455166 -0.50670800

H -2.17612598 0.90429534 -3.28918400

H -3.03578198 -0.58717966 -3.70831200

H -3.71755198 0.50151234 -2.51321900

H -1.38875998 3.70992134 0.48694900

H -2.27897398 2.73528234 -0.68977900

H -2.87454298 2.87377834 0.97826800

H -2.40297698 -3.18378866 -2.61438900

H -6.54721098 -1.65053666 0.43424600

H -7.31060198 -0.58953166 1.72286900

H -5.93541898 3.84440734 1.50722500

H -4.71451498 5.99508634 1.10078500

H -4.25247098 4.96881134 -3.04332300

H -5.49039698 2.82894434 -2.66379000

H -13.23432398 1.70985034 -0.67048800

H -11.86131198 2.67019634 -0.08367900

H -11.94513198 2.18888034 -1.79333600

H -11.70017298 -0.23139966 -1.12077300

H -11.61740298 0.24747034 0.58263700

F -3.77327598 6.71981534 -1.19952200

**TS-2 GAS**

E(RB3LYP) = -1630.63620471 A.U.

1 imaginary frequency -320.0754 cm-1

Sum of electronic and zero-point Energies= -1630.125916

Sum of electronic and thermal Energies= -1630.093190

Sum of electronic and thermal Enthalpies= -1630.092246

Sum of electronic and thermal Free Energies= -1630.192643

E (Thermal) CV S

KCal/Mol Cal/Mol-Kelvin Cal/Mol-Kelvin

Total 340.747 124.383 211.304

C 5.44018600 0.04394700 -0.68896200

C 4.06001600 0.24864500 -1.31344100

C 3.04067400 0.92813000 -0.48697900

C 3.37095700 -1.87215000 1.50064500

C 4.43432800 -1.07891600 1.29170400

C 5.52457300 -1.18800400 0.26158800

C 1.53501700 0.68354900 -0.47793100

C 1.09507500 -0.76431200 -0.10918800

C 0.91943800 -1.13612300 1.37534400

C 2.19120700 -1.27787900 2.25229500

C 3.22030300 -3.28548700 0.99456300

C 3.70084600 -0.68950200 -2.44810000

O 0.94963200 0.95552600 -1.76787100

C -0.12568400 0.12563800 -2.00205100

C -0.16550700 -0.90101600 -0.94798700

O -0.85237300 0.29854200 -2.95677500

O 1.76888700 -2.06954500 3.37019800

O 3.68424500 1.63076000 -1.55014600

C -1.98283200 0.60686700 0.13265500

N -2.67645700 -0.35608200 0.33320900

N -2.61720700 -1.64193300 0.24513000

C -0.99115500 -2.00055700 -1.03283900

C -1.74664800 1.99729500 0.38377600

C -1.75901000 2.49771800 1.70365700

C -1.53149800 3.84708200 1.94110300

C -1.28708600 4.68536700 0.85446600

C -1.26333900 4.22019700 -0.45720600

C -1.49116900 2.86956500 -0.69494000

C -3.77364400 -2.34345300 -0.10801600

O -3.72544400 -3.50287100 -0.46376500

O -4.90559900 -1.61622400 0.01854800

C -7.27428300 -1.35005200 -0.11174700

C -6.12602100 -2.32126200 -0.31037600

H 6.19526700 -0.05422500 -1.47978500

H 5.69033500 0.95042900 -0.12428000

H 3.37242800 1.26375100 0.49695100

H 4.43501400 -0.12032900 1.81405800

H 5.44410000 -2.11730500 -0.31229300

H 6.52085400 -1.18812300 0.72543400

H 1.08458300 1.39495400 0.22778400

H 1.84533500 -1.44018200 -0.53659000

H 0.41357900 -2.10776700 1.41518800

H 0.24107900 -0.42796100 1.86693900

H 2.48928500 -0.27702500 2.60422600

H 4.14024400 -3.66474600 0.54267500

H 2.95413000 -3.94322000 1.83046100

H 2.41268900 -3.38719500 0.25798900

H 4.44068100 -0.58807900 -3.25158900

H 3.70777600 -1.73666100 -2.12289700

H 2.71955400 -0.45078900 -2.86016600

H 2.52185800 -2.12624400 3.97980400

H -1.63502400 -2.09692600 -1.90139500

H -0.76694800 -2.91969200 -0.50466700

H -1.95578600 1.82317400 2.53075900

H -1.54298600 4.25898500 2.94451400

H -1.06585900 4.91165500 -1.26899700

H -1.47081600 2.47903800 -1.70663800

H -8.22211600 -1.84336600 -0.35316900

H -7.31968000 -1.00427500 0.92592600

H -7.16429500 -0.47669300 -0.76239700

H -6.06097700 -2.67617900 -1.34364900

H -6.21132100 -3.19887600 0.33816500

F -1.06673100 5.98986000 1.08506400

**TS-2 DCM**

E(RB3LYP) = -1630.65692161 A.U.

1 imaginary frequency -327.5502 cm-1

Sum of electronic and zero-point Energies= -1630.147028

Sum of electronic and thermal Energies= -1630.114263

Sum of electronic and thermal Enthalpies= -1630.113319

Sum of electronic and thermal Free Energies= -1630.213404

E (Thermal) CV S

KCal/Mol Cal/Mol-Kelvin Cal/Mol-Kelvin

Total 340.523 124.579 210.648

C 5.43300300 -0.02919400 -0.74001500

C 4.04833200 0.13775100 -1.36280400

C 3.04724500 0.88962600 -0.57947500

C 3.35287700 -1.80519000 1.55594700

C 4.41691500 -1.02413900 1.30549400

C 5.51182200 -1.19711200 0.28921400

C 1.53867700 0.66395700 -0.53155500

C 1.07984600 -0.76052200 -0.10203000

C 0.90416100 -1.06584100 1.39779700

C 2.17613300 -1.17166300 2.27923500

C 3.19965800 -3.24184500 1.12061400

C 3.66982800 -0.88610600 -2.41331800

O 0.93651000 0.89391000 -1.82979000

C -0.14216500 0.06513200 -2.01958500

C -0.18814100 -0.91416700 -0.92966600

O -0.86607900 0.20404000 -2.98891200

O 1.74992400 -1.91127300 3.43496900

O 3.67719400 1.50384400 -1.71144200

C -1.99225900 0.62381500 0.14797300

N -2.69395700 -0.33228600 0.34575300

N -2.63701700 -1.62403100 0.26238300

C -1.01677400 -2.01695300 -0.97790900

C -1.72128800 2.00831500 0.38153500

C -1.51479000 2.87489600 -0.71242000

C -1.25608200 4.22220100 -0.49259900

C -1.19771200 4.68584300 0.81916000

C -1.39090400 3.85408000 1.92077100

C -1.65193600 2.50817800 1.70063200

C -3.80185800 -2.31560400 -0.07001600

O -3.76588800 -3.49233800 -0.38391900

O -4.92220500 -1.57415600 0.02186400

C -7.28990500 -1.27059300 -0.11464900

C -6.16102000 -2.26889300 -0.28042600

H 6.18004300 -0.18783600 -1.52819900

H 5.69350700 0.90958200 -0.23650700

H 3.39792400 1.30553700 0.36481800

H 4.42046700 -0.03999800 1.77719900

H 5.43776400 -2.16081300 -0.22493100

H 6.50511400 -1.16246400 0.75702700

H 1.10851400 1.41251800 0.14502100

H 1.81527500 -1.46816200 -0.50090600

H 0.39891600 -2.03603400 1.47269400

H 0.22834800 -0.33564800 1.85870700

H 2.47560700 -0.15895700 2.58790500

H 4.10827800 -3.63478700 0.65816300

H 2.96760000 -3.86348700 1.99375900

H 2.37119400 -3.38326800 0.41433300

H 4.39252100 -0.84491200 -3.23735400

H 3.69297800 -1.90298300 -2.00639200

H 2.67664900 -0.69177300 -2.82095300

H 2.49933300 -1.92802400 4.05225000

H -1.65141500 -2.14927100 -1.84848900

H -0.77639800 -2.91805200 -0.42636500

H -1.56058600 2.48428400 -1.72276100

H -1.10001400 4.91056100 -1.31567300

H -1.33834400 4.26499100 2.92293000

H -1.80942400 1.83954500 2.54011300

H -8.24431400 -1.75903600 -0.33737100

H -7.32900000 -0.88911100 0.91063800

H -7.16819500 -0.42436200 -0.79824400

H -6.10353600 -2.65732900 -1.30141800

H -6.26027400 -3.11801200 0.40212700

F -0.94548100 5.98816500 1.03303800

**TS-3 GAS**

E(RB3LYP) = -1630.61877604 A.U.

1 imaginary frequency -325.3324 cm-1

Sum of electronic and zero-point Energies= -1630.108746

Sum of electronic and thermal Energies= -1630.075893

Sum of electronic and thermal Enthalpies= -1630.074949

Sum of electronic and thermal Free Energies= -1630.176458

E (Thermal) CV S

KCal/Mol Cal/Mol-Kelvin Cal/Mol-Kelvin

Total 340.664 124.638 213.644

C 4.37199400 -0.89665100 -1.30807500

C 2.98941700 -0.35295500 -1.23623800

C 2.35970100 0.57526400 -0.20011400

C 1.05019300 0.20475700 0.58576400

C 4.63532600 -2.03884600 -2.27779200

O 1.85486500 1.68917900 -1.01859600

C 0.56367800 1.43848700 -1.39388200

C 0.05302100 0.31635400 -0.55104500

O 0.00319400 2.05928800 -2.26486800

O 4.01925900 0.31688900 -1.98825700

N -1.53524400 1.82792300 0.68299700

N -2.55834100 1.14068700 0.35121700

C -2.86217600 0.08578200 -0.16004700

C -0.89321800 -0.56017500 -1.00651400

C -3.95650700 -0.85446700 -0.16346700

C -4.04032300 -1.84432100 -1.15870500

C -5.09513900 -2.75123400 -1.16851700

C -6.06710700 -2.65640900 -0.17753900

C -6.01747800 -1.68616500 0.82096300

C -4.95776300 -0.78798000 0.82816200

C -1.59844800 3.19101400 0.32753900

O -2.55560800 3.79457500 -0.10844300

O -0.37997400 3.71127600 0.57459400

C -0.63475000 6.06787000 1.20509200

C -0.17702900 5.07782100 0.14494300

H 3.12009000 1.00804200 0.44982900

H 0.89876400 1.12928500 1.15274200

H 4.62103000 -3.01793500 -1.78898600

H 3.88814900 -2.03971700 -3.07638300

H 5.62165800 -1.90569400 -2.73882800

H -0.98801100 -1.54589000 -0.56072800

H -3.27937400 -1.89497300 -1.92989700

H -5.17837100 -3.51905300 -1.93006200

H -6.79982700 -1.64838700 1.57149600

H -4.89740900 -0.02205000 1.59432300

H -0.39929900 7.08945900 0.88436900

H -1.71518800 5.99540500 1.35712100

H -0.12796700 5.88180700 2.15805900

H 0.89900200 5.14175700 -0.03170000

H -0.70550000 5.22936200 -0.79894700

C 0.83592700 -0.90684600 1.64881200

H -0.23172400 -1.16436400 1.61780200

C 1.63046500 -2.22628600 1.65779700

O 1.41821200 -2.97114100 0.45723800

C 3.11360600 -1.98273000 1.86144000

C 3.98551100 -2.45959600 0.96780500

C 5.40444000 -2.01253700 0.75616300

C 5.37589200 -0.76165800 -0.16989300

H 0.97528100 -0.44969300 2.63454100

H 3.57345700 -3.08161900 0.18047800

H 5.98922200 -2.81168900 0.28546700

H 5.91789500 -1.75312800 1.68859900

F -7.08805700 -3.52999000 -0.18265300

C 3.49198500 -1.14280100 3.05995100

H 2.93719000 -1.46067300 3.95311700

H 4.55719500 -1.23155800 3.28877000

H 3.27488500 -0.07515800 2.92135700

H 0.51505900 -3.31922800 0.49125900

H -1.25621500 -0.43974100 -2.02308400

H 6.37136000 -0.58321200 -0.59867400

H 5.12697400 0.12374200 0.42324900

H 1.24604600 -2.80328400 2.51895400

H 2.24634500 -0.85684100 -1.85882500

**TS-3 DCM**

E(RB3LYP) = -1630.66252482 A.U.

1 imaginary frequency -357.0648 cm-1

Sum of electronic and zero-point Energies= -1630.152745

Sum of electronic and thermal Energies= -1630.119993

Sum of electronic and thermal Enthalpies= -1630.119049

Sum of electronic and thermal Free Energies= -1630.219678

E (Thermal) CV S

KCal/Mol Cal/Mol-Kelvin Cal/Mol-Kelvin

Total 340.444 124.522 211.791

C 4.42490500 -0.97682200 -1.39749100

C 3.01897100 -0.50313000 -1.49576000

C 2.26048900 0.35010600 -0.49245100

C 0.96570500 -0.27266200 0.12770800

C 4.82474600 -2.18200100 -2.22853300

O 1.76943000 1.50852700 -1.24304300

C 0.47214100 1.32901500 -1.61370300

C -0.06409500 0.14146200 -0.90752600

O -0.07274200 2.06068500 -2.41508900

O 4.07722000 0.18191500 -2.18935200

N -1.35737100 1.75922800 0.61853500

N -2.46133700 1.16923000 0.32899300

C -2.87243400 0.17375500 -0.22944800

C -1.17479000 -0.51960900 -1.36686200

C -4.02397400 -0.69576100 -0.19235200

C -4.34416100 -1.50873600 -1.29471900

C -5.46168400 -2.33558100 -1.25859300

C -6.25064800 -2.33950400 -0.11228800

C -5.96256900 -1.54793200 0.99736800

C -4.84329500 -0.72656000 0.95609100

C -1.37530500 3.14438900 0.38813700

O -2.32238500 3.82208300 0.02959900

O -0.13617200 3.60671900 0.63942100

C -0.30547400 5.83474300 1.65145900

C 0.07923200 5.02377700 0.42405700

H 2.92624200 0.75829100 0.26505800

H 0.75627000 0.31730300 1.02832200

H 4.75485400 -3.10896200 -1.64949200

H 4.18123500 -2.27592100 -3.10799200

H 5.86145200 -2.07641500 -2.56931800

H -1.35980100 -1.54925600 -1.07730300

H -3.72327100 -1.48898400 -2.18327000

H -5.72718500 -2.96690700 -2.09922800

H -6.60675400 -1.58464900 1.86903300

H -4.59663900 -0.10115600 1.80735500

H -0.06359700 6.89040700 1.48479100

H -1.37824200 5.75438400 1.84931600

H 0.24441200 5.49109600 2.53368100

H 1.14757800 5.10100700 0.21170300

H -0.48631400 5.33620800 -0.45654700

C 0.96547000 -1.75760500 0.52881100

H 1.46695700 -2.37415200 -0.22526700

C 1.58685500 -2.06055000 1.91255300

O 1.51196800 -3.46685700 2.17829000

C 3.04563600 -1.62908000 1.99590400

C 3.92998200 -2.22470300 1.18534600

C 5.33772600 -1.78766000 0.87916900

C 5.31889100 -0.67349300 -0.20172300

H -0.07846900 -2.09654100 0.56808000

H 3.55628500 -3.03961300 0.56614600

H 5.92375000 -2.64178800 0.52114900

H 5.85693200 -1.40078400 1.76274200

F -7.33181400 -3.13841800 -0.07270700

C 3.35972400 -0.51037200 2.95639000

H 3.07663100 -0.79692800 3.97857400

H 4.41990700 -0.24459800 2.96229100

H 2.78842900 0.39943500 2.72571600

H 0.57705300 -3.72367100 2.11372200

H -1.60014000 -0.19344000 -2.31203000

H 6.33776700 -0.50572700 -0.57621700

H 4.99734700 0.26704700 0.25486300

H 1.01075900 -1.51095200 2.67391900

H 2.36302300 -1.06567100 -2.16600000

**TS-4 GAS**

E(RB3LYP) = -1630.64419070 A.U.

1 imaginary frequency -327.8407 cm-1

Sum of electronic and zero-point Energies= -1630.133882

Sum of electronic and thermal Energies= -1630.101198

Sum of electronic and thermal Enthalpies= -1630.100254

Sum of electronic and thermal Free Energies= -1630.199849

E (Thermal) CV S

KCal/Mol Cal/Mol-Kelvin Cal/Mol-Kelvin

Total 340.733 124.442 209.615

C 3.84840200 -0.22495900 -0.95703900

C 2.63152600 0.29415900 -0.27430500

C 2.12149700 -0.07758800 1.10821800

C 0.74958800 -0.83092000 1.22820100

C 3.92036100 -0.07513600 -2.46715000

O 1.91540600 1.17991700 1.81362000

C 0.59350600 1.47108600 1.97611200

C -0.20630100 0.28746700 1.58119100

O 3.86875700 1.03086900 -0.25692600

N -0.59931600 1.48375000 -0.74835700

N -1.84177500 1.21379100 -0.64529700

C -2.65658700 0.62634000 0.03045600

C -1.54372300 0.18269700 1.85711100

C -3.97565700 0.05506600 -0.12153200

C -4.77115200 -0.20844700 1.00701700

C -6.04407600 -0.75092400 0.86440300

C -6.51247700 -1.02794000 -0.41604100

C -5.75106100 -0.77904500 -1.55561200

C -4.48009700 -0.23876800 -1.40513200

C -0.34293000 2.87467000 -0.87807000

O -1.16771800 3.75124100 -1.02248800

O 0.98699800 3.03370800 -0.81331900

C 2.69426600 4.39270800 0.17593500

C 1.49325300 4.39057800 -0.75214100

H 1.87184500 0.74883000 -0.90665800

H 2.90382000 -0.59431500 1.66516900

H 0.82756800 -1.44734500 2.13829500

H 3.56848900 -0.97564400 -2.98311600

H 3.31025200 0.77103900 -2.79465600

H 4.95570400 0.10915000 -2.77928300

H -2.01011400 0.99484000 2.40833600

H -2.01097000 -0.79646500 1.92297200

H -4.39364600 0.02257300 1.99719100

H -6.67454500 -0.95658500 1.72260800

H -6.15802500 -1.01022800 -2.53419100

H -3.86767600 -0.03507200 -2.27726500

H 3.13815300 5.39486300 0.19976300

H 2.38780200 4.11504600 1.18856700

H 1.76029000 4.68507400 -1.77380900

H 0.69166700 5.04503900 -0.40379900

C 0.29564000 -1.75905000 0.08430500

H 0.61643600 -1.36396800 -0.88394100

C 0.77646900 -3.21932500 0.19484200

C 2.29669400 -3.31556100 0.29129800

C 3.01683200 -3.01911900 -0.79923700

C 4.49246700 -2.72962900 -0.86480000

C 4.76586300 -1.28672000 -0.36112200

H -0.80002400 -1.78507000 0.05868600

H 2.45428800 -2.81246500 -1.70938200

H 5.08101500 -3.42692600 -0.25703100

H 5.80209300 -1.00530900 -0.59484500

H 4.67895700 -1.26157500 0.72899200

F -7.74059900 -1.55381800 -0.55889500

H 3.44920100 3.67652800 -0.16141500

H 4.84958700 -2.83950300 -1.89517100

C 2.87286200 -3.65847100 1.64259600

H 2.47137800 -4.61625900 2.00160200

H 3.96299200 -3.73795200 1.62537600

H 2.60837200 -2.91335800 2.40536600

H 0.33419200 -3.66550300 1.10339700

O 0.24777900 -3.86560500 -0.96508000

H 0.69273500 -4.72425600 -1.04279200

O 0.21630500 2.52829000 2.42914900

**TS-4 DCM**

E(RB3LYP) = -1630.66550639 A.U.

1 imaginary frequency -341.4635 cm-1

Sum of electronic and zero-point Energies= -1630.155926

Sum of electronic and thermal Energies= -1630.123058

Sum of electronic and thermal Enthalpies= -1630.122113

Sum of electronic and thermal Free Energies= -1630.222452

E (Thermal) CV S

KCal/Mol Cal/Mol-Kelvin Cal/Mol-Kelvin

Total 340.392 124.717 211.179

C 3.85039600 -0.26325800 -0.89803000

C 2.63046300 0.25264100 -0.22072400

C 2.09343600 -0.16051200 1.13856400

C 0.70572300 -0.88529300 1.21696600

C 3.95131600 -0.06803300 -2.40033600

O 1.90104400 1.08432800 1.88538600

C 0.58548400 1.38428000 2.05403500

C -0.23130600 0.23603400 1.60763100

O 3.87844200 0.97604900 -0.15617400

N -0.57655100 1.57788800 -0.66186500

N -1.83323200 1.32288900 -0.58522800

C -2.64322300 0.68815700 0.05265500

C -1.57495200 0.14771100 1.85898300

C -3.95450000 0.10710000 -0.11487200

C -4.77212900 -0.14779800 1.00084100

C -6.03907800 -0.69619000 0.83393100

C -6.47417600 -0.98777900 -0.45534700

C -5.68987500 -0.74988000 -1.58175100

C -4.42485200 -0.20276000 -1.40835500

C -0.30203800 2.95154600 -0.80036900

O -1.10914500 3.84970300 -0.96411500

O 1.02940900 3.10829800 -0.72503200

C 2.89745300 4.46964600 -0.11274200

C 1.53641100 4.46438400 -0.78244900

H 1.88781700 0.73906500 -0.85005000

H 2.85514200 -0.70928900 1.69174200

H 0.75978900 -1.53568500 2.10315400

H 3.59370800 -0.94808800 -2.94546400

H 3.35966900 0.79578000 -2.71641500

H 4.99525200 0.10447700 -2.68842000

H -2.03816000 0.94013000 2.44053800

H -2.05849400 -0.82477300 1.87695900

H -4.42024300 0.09079100 1.99824500

H -6.68625400 -0.89609400 1.68063700

H -6.07142200 -0.99393500 -2.56713800

H -3.79410000 -0.00888400 -2.26924100

H 3.34518100 5.46558100 -0.19747500

H 2.80302300 4.21811400 0.94835800

H 1.59651500 4.75829600 -1.83621400

H 0.82690100 5.12782000 -0.28286300

C 0.24589700 -1.76163700 0.03385900

H 0.59248300 -1.34155400 -0.91524500

C 0.69217500 -3.23499100 0.10550600

C 2.20864500 -3.36748300 0.22355000

C 2.95551700 -3.03441200 -0.83820300

C 4.43889900 -2.78000200 -0.86721500

C 4.73788400 -1.35854700 -0.31897100

H -0.84946200 -1.75864000 -0.00485900

H 2.41788200 -2.77267700 -1.74921300

H 4.99854800 -3.50496900 -0.26559900

H 5.78203700 -1.09395500 -0.53497200

H 4.63814900 -1.36385700 0.77042300

F -7.69794700 -1.52042300 -0.62089400

H 3.56582100 3.73963400 -0.57876700

H 4.81398300 -2.86960300 -1.89291000

C 2.74857300 -3.79331800 1.56603700

H 2.31811400 -4.75973600 1.86149300

H 3.83698500 -3.89418500 1.56729300

H 2.48083900 -3.08529400 2.36229500

H 0.22468500 -3.69936800 0.98974200

O 0.16734200 -3.83426700 -1.08455100

H 0.56350800 -4.71763400 -1.15760300

O 0.23031300 2.43079700 2.55949800

**TS-5 GAS**

E(RB3LYP) = -1630.61667422 A.U.

1 imaginary frequency -348.7065 cm-1

Sum of electronic and zero-point Energies= -1630.105619

Sum of electronic and thermal Energies= -1630.073339

Sum of electronic and thermal Enthalpies= -1630.072394

Sum of electronic and thermal Free Energies= -1630.169664

E (Thermal) CV S

KCal/Mol Cal/Mol-Kelvin Cal/Mol-Kelvin

Total 340.948 124.438 204.720

C 1.74471000 -2.19941400 1.04732700

C 0.56693300 -2.58900100 0.14824300

C -0.71289000 -2.93584900 0.79617500

C -0.25363300 0.76309000 2.03820100

C 1.04568100 0.25903900 1.96929200

C 1.47216000 -1.19975300 2.20533400

C -2.09593700 -2.59247900 0.26447100

C -2.30001100 -1.07185300 0.01025500

C -2.60153400 -0.20608300 1.23706400

C -1.48864800 -0.11219300 2.30712400

N -0.40874600 1.50712500 -0.41263300

N 0.87477600 1.45190100 -0.56112500

C 1.82668600 0.99252500 0.04044800

C 3.22253200 0.73765200 -0.24988000

C -0.41846300 2.23002800 2.38345700

C 0.65232300 -2.14398700 -1.29899200

O -2.38486100 -3.23311800 -0.99455500

C -3.25427900 -2.45842200 -1.72183800

C -3.36204100 -1.12062200 -1.06164600

C -4.26097500 -0.21710100 -1.45151600

O -3.78986900 -2.85767700 -2.72447600

O -2.07099000 0.31926900 3.54841200

C 4.17686200 0.58436400 0.77085000

C 5.51916100 0.38290800 0.46490800

C 5.90366400 0.34309700 -0.87123600

C 4.98700000 0.49632300 -1.90831600

C 3.64714700 0.68796300 -1.59537100

C -0.98066900 2.66310500 -0.94143500

O -0.45425600 3.50504900 -1.64295400

O -2.28187100 2.72481700 -0.53740000

C -4.34126900 3.92877600 -0.30506500

C -3.00484200 3.87839500 -1.02200700

H 2.11037200 -3.12240000 1.51362900

H 2.56224900 -1.82436500 0.42426000

H -0.71744600 -2.94395100 1.88775800

H 1.78370000 0.97364300 2.33456500

H 0.75507100 -1.66249800 2.89347700

H 2.40766200 -1.15153300 2.77646400

H -2.84453800 -2.95378800 0.98437400

H -1.38875800 -0.68119900 -0.45464600

H -2.84565100 0.80455600 0.89331500

H -3.48183700 -0.60717300 1.75644200

H -1.14710900 -1.12042400 2.53679800

H -0.42350900 2.35378400 3.47405800

H 0.40861400 2.82263500 1.98230200

H -1.35003000 2.64961400 1.99142700

H 1.57874000 -2.53765900 -1.73540200

H -0.18528900 -2.53538300 -1.87724900

H 0.67671700 -1.05466100 -1.39306800

H -4.93821700 -0.45031000 -2.26839500

H -4.33556800 0.76140200 -0.98908700

H 3.87087300 0.62501100 1.80994000

H 6.26626800 0.26310400 1.24201700

H 5.32859500 0.46118200 -2.93732400

H 2.91562400 0.81397300 -2.38634100

H -4.90826000 4.80247200 -0.64436400

H -4.94158700 3.03620000 -0.50974400

H -4.20278300 4.01138000 0.77821300

H -2.40861100 4.77544200 -0.83323100

H -3.12757400 3.78688500 -2.10656700

H -2.60420500 1.10944500 3.36456700

F 7.19933800 0.15062500 -1.17054400

O 0.10587600 -3.96799600 0.26446600

**TS-5 DCM**

E(RB3LYP) = -1630.63803125 A.U.

1 imaginary frequency -367.9845 cm-1

Sum of electronic and zero-point Energies= -1630.127373

Sum of electronic and thermal Energies= -1630.095058

Sum of electronic and thermal Enthalpies= -1630.094114

Sum of electronic and thermal Free Energies= -1630.191514

E (Thermal) CV S

KCal/Mol Cal/Mol-Kelvin Cal/Mol-Kelvin

Total 340.721 124.588 204.995

C 1.75319500 -2.18579100 0.98271400

C 0.55115800 -2.56397000 0.11270700

C -0.70676100 -2.92073700 0.79511700

C -0.21995100 0.77422500 2.01920600

C 1.07768800 0.27312900 1.92180100

C 1.51548900 -1.18369400 2.14671500

C -2.10671900 -2.57446500 0.31334100

C -2.32479200 -1.05856100 0.05135600

C -2.59038400 -0.18550800 1.28106200

C -1.44583900 -0.10280200 2.31802900

N -0.39802000 1.51277500 -0.47158200

N 0.89479300 1.47008700 -0.61325100

C 1.83905800 1.00737700 -0.00186200

C 3.23676300 0.73426100 -0.26833200

C -0.38529300 2.24472000 2.34432100

C 0.59347400 -2.09606000 -1.32862300

O -2.43954800 -3.22740800 -0.93820100

C -3.32431000 -2.45747100 -1.63968500

C -3.42320100 -1.12141300 -0.98424500

C -4.35108700 -0.23076900 -1.33700800

O -3.88238100 -2.87123900 -2.63076400

O -1.98938000 0.31972300 3.58155000

C 4.19300600 0.70135300 0.76251200

C 5.53527200 0.47343000 0.47652100

C 5.91346600 0.28275500 -0.84841600

C 4.99608200 0.31270800 -1.89542200

C 3.65617000 0.53402600 -1.60160600

C -0.96631200 2.67275900 -0.97741800

O -0.42681500 3.54626500 -1.64166000

O -2.27404100 2.71380200 -0.61039100

C -4.34045200 3.90264500 -0.33913500

C -2.99682200 3.89094600 -1.04256700

H 2.12346600 -3.10933600 1.44354700

H 2.55835900 -1.81942500 0.33925800

H -0.67544900 -2.95069700 1.88453400

H 1.81817700 0.99080300 2.27463800

H 0.82383400 -1.64718000 2.85959000

H 2.47018000 -1.13139200 2.68257600

H -2.83167400 -2.93515600 1.05430200

H -1.43148600 -0.66613000 -0.44615600

H -2.83556700 0.82549400 0.94027700

H -3.45996500 -0.57771800 1.82333900

H -1.09822400 -1.11288400 2.52903000

H -0.37268000 2.38524500 3.43275600

H 0.43428500 2.83407100 1.92433500

H -1.32648400 2.65382100 1.96530300

H 1.50496900 -2.48352100 -1.79988300

H -0.26433000 -2.46759500 -1.89074600

H 0.62075600 -1.00607600 -1.40341400

H -5.06050000 -0.46702000 -2.12513100

H -4.42602100 0.74282200 -0.86522700

H 3.89416400 0.86067200 1.79202600

H 6.28346200 0.44736900 1.26100700

H 5.33338800 0.16118100 -2.91503700

H 2.92452600 0.56240000 -2.40164200

H -4.89709900 4.79883900 -0.63331000

H -4.94223900 3.02813000 -0.60645300

H -4.21285600 3.91930400 0.74818900

H -2.40624100 4.77744400 -0.79632800

H -3.10903300 3.85458800 -2.13134900

H -2.52016800 1.11859300 3.42708100

F 7.21114700 0.06167500 -1.12850800

O 0.09083000 -3.95118400 0.21656600

**TS-6 GAS**

E(RB3LYP) = -1630.62079132 A.U.

1 imaginary frequency -373.4779 cm-1

Sum of electronic and zero-point Energies= -1630.109959

Sum of electronic and thermal Energies= -1630.077432

Sum of electronic and thermal Enthalpies= -1630.076488

Sum of electronic and thermal Free Energies= -1630.175420

E (Thermal) CV S

KCal/Mol Cal/Mol-Kelvin Cal/Mol-Kelvin

Total 340.963 124.514 208.221

C -2.40858700 1.88701000 -0.05250100

C -3.98944200 0.15924200 -1.35458400

C 0.28675600 -0.20269800 0.26566100

C 0.01860200 1.16922400 0.35549400

C -0.91891700 1.98680800 -0.51339700

C -3.83334700 -1.14833400 -0.59615700

C -2.63426700 -1.50214900 0.32652600

C -1.38566700 -2.05351600 -0.38344600

C -0.36137400 -1.00073900 -0.86879000

C 2.55393200 -0.09026200 -0.33600100

N 2.64545700 1.11316600 -0.46907500

N 1.85417000 2.13072300 -0.43709300

C 3.53496000 -1.16250000 -0.26501200

C 3.23869600 -2.51042400 -0.51178800

C 4.25044700 -3.44997800 -0.36812600

C 5.54273000 -3.11524200 0.01511200

C 5.82676800 -1.77008200 0.26553300

C 4.84093700 -0.79796100 0.13608300

O -5.01949700 -1.27856600 0.23085200

C -4.78127100 -2.13328200 1.27193200

C -3.32134600 -2.44956400 1.29114000

C -2.82989500 -3.41293800 2.07072200

O -5.65377900 -2.51609900 2.00959600

O 0.65771000 -1.68811900 -1.62233800

C 2.35870400 3.21549600 0.28415300

O 3.48033500 3.34913900 0.73578000

O 1.37778000 4.14625800 0.39460300

C 0.54350100 6.26173200 1.11965600

C 1.75411600 5.34717000 1.10025800

C 0.61483000 -0.94371600 1.56143100

H -2.73251100 2.86114900 0.33007900

H -4.95126400 0.15284900 -1.87617400

H 0.20749600 1.61941700 1.33019400

H -0.59669500 3.02706500 -0.46165500

H -2.34836700 -0.61994600 0.90748300

H -0.86408800 -2.75284800 0.27734000

H -0.87359100 -0.31194100 -1.54084100

H 2.24837000 -2.80681500 -0.82932100

H 6.29509500 -3.89069200 0.11266500

H 6.82896600 -1.47922900 0.56679400

H 5.05858400 0.24529900 0.33834000

H -3.50143900 -3.97363300 2.71472400

H -1.77516000 -3.67015800 2.09664000

H 0.78929900 7.19179400 1.64360800

H 0.22692300 6.51308800 0.10221700

H -0.29789800 5.78862300 1.63675400

H 2.08258300 5.08085100 2.11034300

H 2.60551200 5.80661000 0.58800200

H -0.29554200 -1.22671400 2.10956900

H 1.18845800 -1.86014600 1.39283000

H 1.20465600 -0.30673800 2.22810900

H -2.50276300 1.20867800 0.79684800

H -0.83179400 1.69155000 -1.56071800

F 3.95944700 -4.74582500 -0.61438300

O -2.89250100 0.56929500 -2.17814600

C -3.38209500 1.49788500 -1.17120300

C -4.12371800 2.67359300 -1.78262700

H -3.40953700 3.42650100 -2.13669000

H -4.73502700 2.35582300 -2.63223000

H -4.77465700 3.14839400 -1.03939300

H -3.89394600 -1.93678700 -1.36309600

H 0.24845500 -2.01447500 -2.44010100

H -1.70323700 -2.64629200 -1.25286700

**TS-6 DCM**

E(RB3LYP) = -1630.63830737 A.U.

1 imaginary frequency -373.3561 cm-1

Sum of electronic and zero-point Energies= -1630.128054

Sum of electronic and thermal Energies= -1630.095454

Sum of electronic and thermal Enthalpies= -1630.094510

Sum of electronic and thermal Free Energies= -1630.194172

E (Thermal) CV S

KCal/Mol Cal/Mol-Kelvin Cal/Mol-Kelvin

Total 340.645 124.702 209.756

C -2.31595100 1.97001500 0.12356100

C -3.98819900 0.39574400 -1.25571000

C 0.28972400 -0.20498000 0.28591300

C 0.08951600 1.17159200 0.42683000

C -0.83943700 2.05582900 -0.38053600

C -3.85212400 -0.97785700 -0.61627300

C -2.68637300 -1.42997600 0.30713500

C -1.44479800 -1.98119100 -0.41711400

C -0.40795100 -0.92932800 -0.87130000

C 2.55821600 -0.17651200 -0.31957300

N 2.72124200 1.01835400 -0.46095300

N 1.97925000 2.07960500 -0.43965100

C 3.45781600 -1.31647300 -0.23940800

C 3.07929700 -2.63032400 -0.55175600

C 4.01780000 -3.64197400 -0.40343000

C 5.31273100 -3.41497100 0.04480300

C 5.67825800 -2.10310700 0.35948800

C 4.76713100 -1.06006800 0.22843900

O -5.06871700 -1.16641400 0.16820300

C -4.86545800 -2.08442600 1.15060100

C -3.41596700 -2.42305100 1.19289900

C -2.95859400 -3.43913900 1.92610300

O -5.77199700 -2.50061800 1.83721800

O 0.58132900 -1.58806200 -1.68711400

C 2.54626700 3.15241700 0.24066300

O 3.67614600 3.23061800 0.69995300

O 1.63334200 4.14849000 0.30542200

C 0.90383000 6.32468800 0.96964900

C 2.06155600 5.34524300 0.99548200

C 0.59689800 -1.00448800 1.55212500

H -2.59228000 2.92006300 0.59228900

H -4.96296000 0.45638100 -1.74826300

H 0.34575900 1.58426100 1.40244600

H -0.48813900 3.08420000 -0.29247100

H -2.38705700 -0.59978100 0.95348200

H -0.93879700 -2.70904500 0.22416200

H -0.92238800 -0.19542300 -1.49283800

H 2.08360000 -2.84173700 -0.91836500

H 6.00637400 -4.24308300 0.14338200

H 6.68390900 -1.89538900 0.71221500

H 5.05084100 -0.04394500 0.47961700

H -3.65106700 -4.03233400 2.51656800

H -1.90879100 -3.71256700 1.96509400

H 1.19402800 7.24877200 1.48062100

H 0.62384400 6.57365600 -0.05903900

H 0.02771300 5.91061900 1.47930100

H 2.34970800 5.08187300 2.01805900

H 2.94548200 5.74645000 0.48994000

H -0.32233500 -1.25501800 2.09936400

H 1.11595400 -1.94510600 1.34692300

H 1.22523900 -0.41978900 2.23122100

H -2.40386500 1.22823600 0.91755300

H -0.79387100 1.80325900 -1.44136700

F 3.64850000 -4.90596000 -0.71366100

O -2.90432700 0.83900900 -2.08095900

C -3.33705700 1.69982600 -0.98671900

C -4.06422700 2.93884800 -1.47755200

H -3.34130100 3.69693500 -1.80129100

H -4.72031600 2.70411300 -2.32087200

H -4.66867200 3.37226700 -0.67277600

H -3.90875800 -1.69326500 -1.44957500

H 0.12816500 -1.93957400 -2.47193600

H -1.77361200 -2.53930400 -1.30397700
